# Supplementary material for: Comparing local ancestry inference models in populations of two- and three-way admixture
Source: PubMed Central journal article supplement (PMC7537619; doi:10.7717/peerj.10090), 2020-10-02

# HIS haplotype ancestry distribution

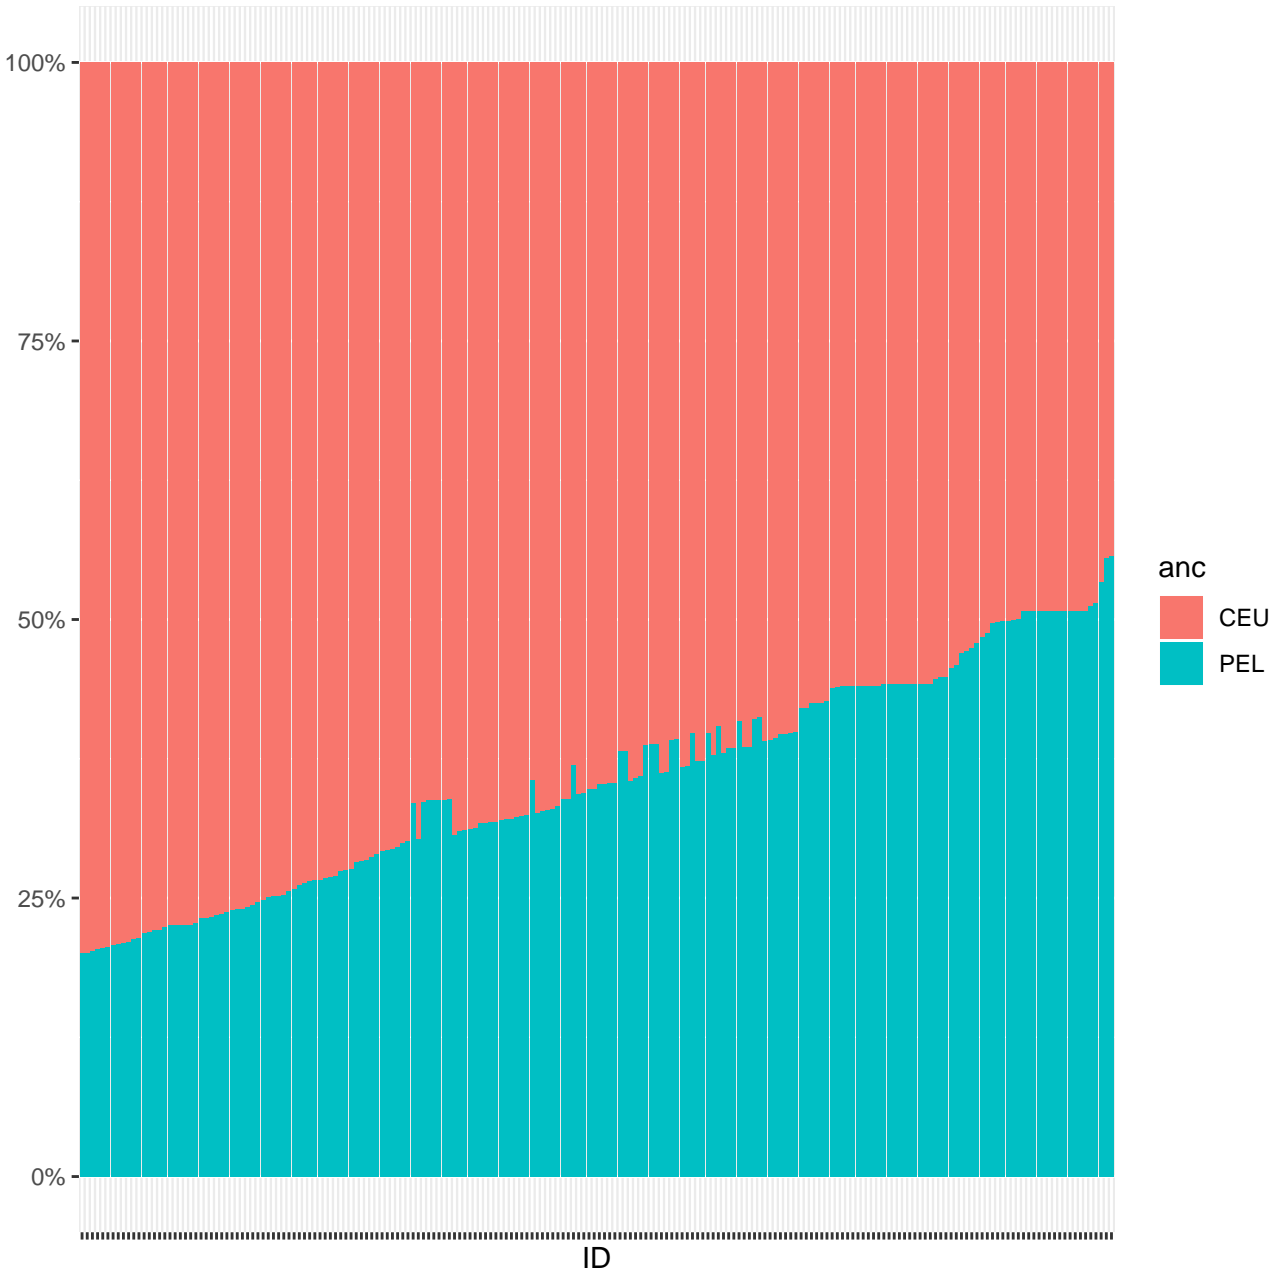

Supplement: peerj-08-10090-s002.pdf [file peerj-08-10090-s002.pdf]
