# Supplementary material for: Comparing local ancestry inference models in populations of two- and three-way admixture
Source: PubMed Central journal article supplement (PMC7537619; doi:10.7717/peerj.10090), 2020-10-02

# 3WAY haplotype ancestry distribution

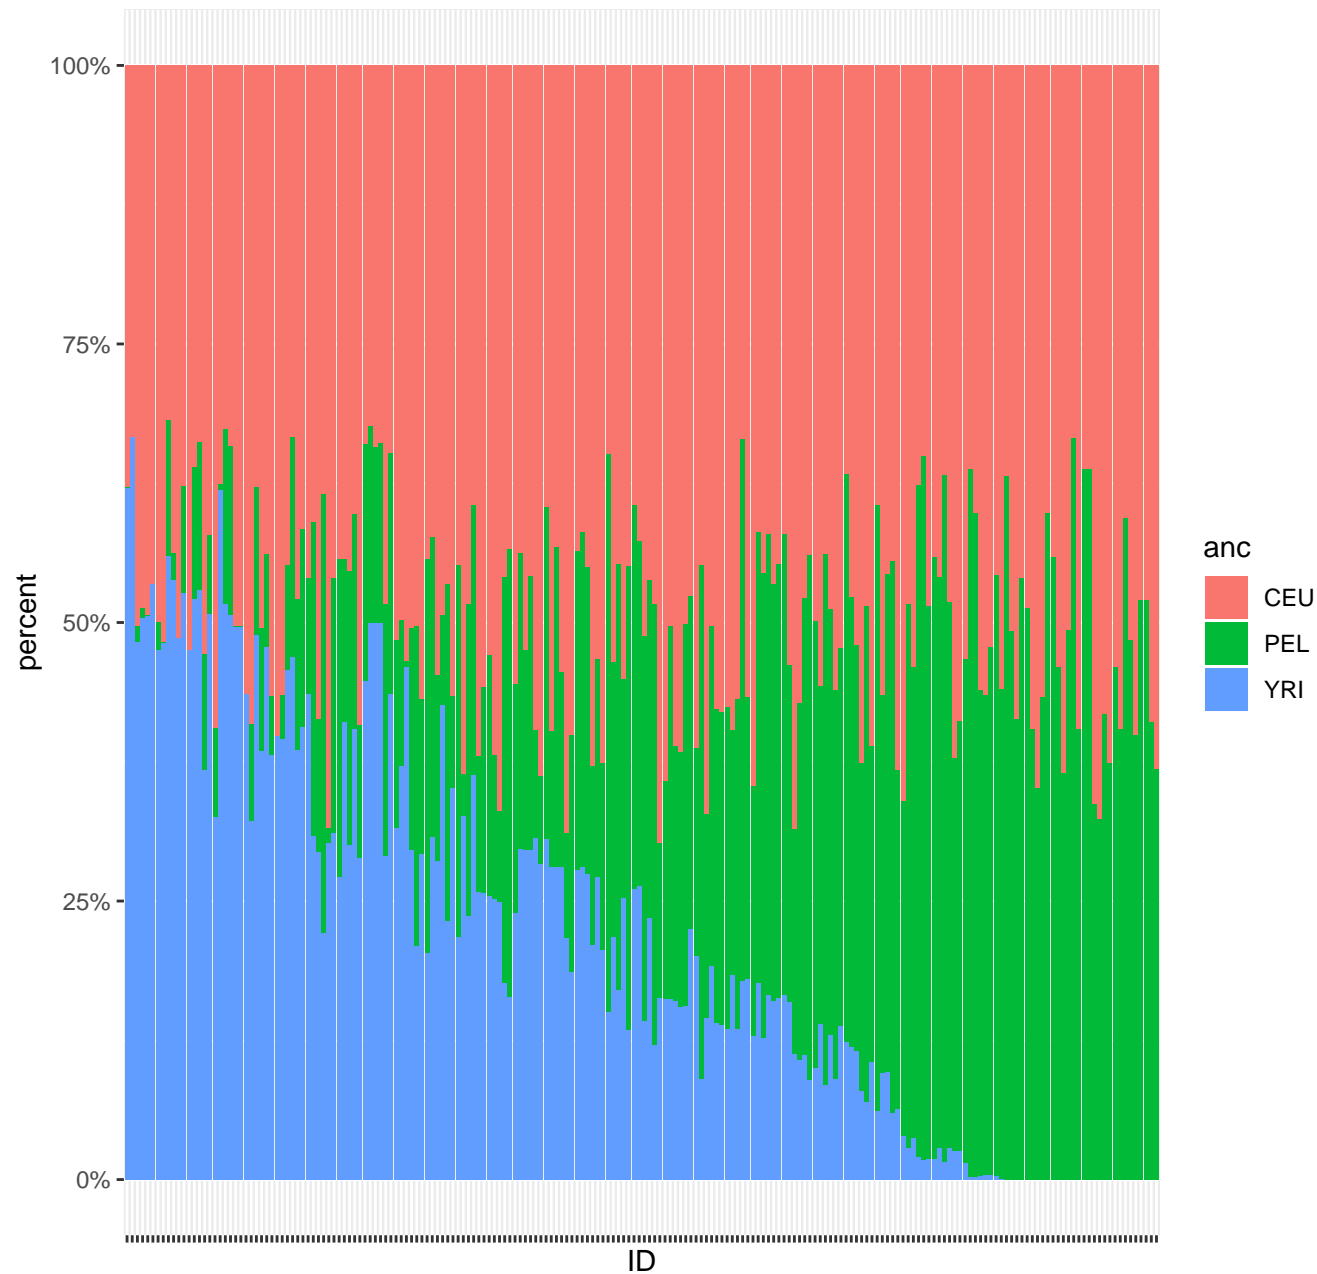

Supplement: peerj-08-10090-s003.pdf [file peerj-08-10090-s003.pdf]
